# Supplementary material
Source: Research Square preprint supplement (doi:10.21203/rs.3.rs-6576309/v1)

**Table S1: Location, date and animal species sampling.**

**Figure S1:** graphical representation of positive samples collected from 2014 to 2020 according to the different animal groups**.**

**
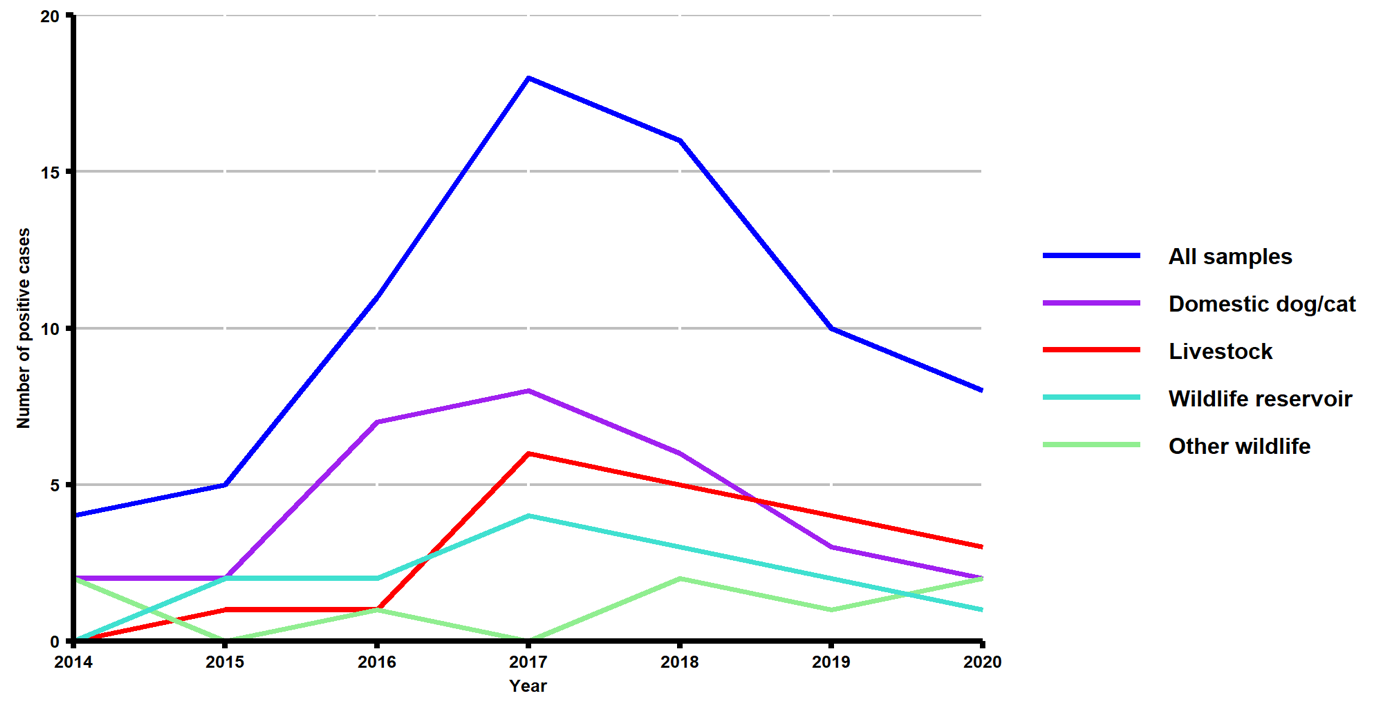
**

**Figure S2: DFAT or PCR confirmed rabies positive samples in companion animals, livestock, known wildlife reservoir and wildlife from 2014 to 2020.** Urban district (except Bulawayo and Harare) polygons were merged with the corresponding rural districts. Districts from Harare municipality were merged in one polygon. This map was designed using QGIS Geographic Information System (Version 3.34.15). OpenSource Geospatial Foundation Project (<http://qgis.org>).


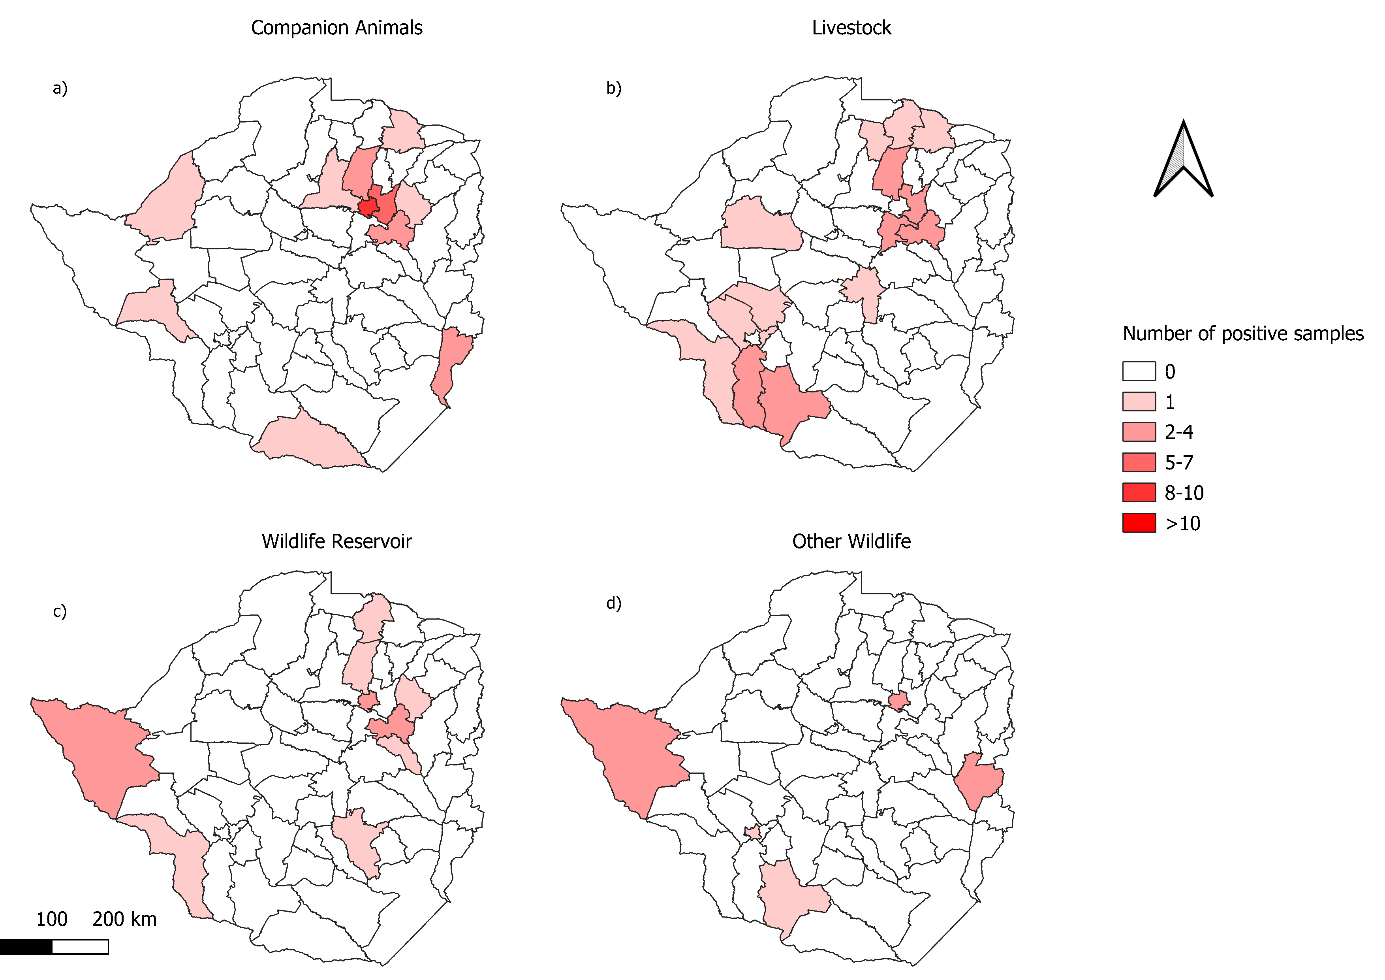

Supplement: Supplementary file 1 [file 9b0d95fdb83151d4f96dfef0.docx]
